# Supplementary material for: A Facile Profiling Method of Short Chain Fatty Acids Using Liquid Chromatography-Mass Spectrometry
Source: PubMed Central journal article supplement (PMC6780976; doi:10.3390/metabo9090173), 2019-08-28
Supplement: metabolites-09-00173-s001.pdf [file metabolites-09-00173-s001.pdf]

# A Facile Profiling Method of Short Chain Fatty Acids using Liquid Chromatography-Mass Spectrometry

Ha Eun Song<sup>1</sup>, Hyo Yeong Lee<sup>1</sup>, Su Jung Kim<sup>1</sup>, Sung Hoon Back<sup>2</sup>, and Hyun Ju Yoo<sup>1\*</sup>

<sup>1</sup> Department of Convergence Medicine, Asan Institute for Life Sciences, Asan Medical Center, University of Ulsan College of Medicine, Seoul 05505, Republic of Korea; hes1290@snu.ac.kr (H.E.S.); lhy\_1279@naver.com (H.Y.L.); sujungea@hanmail.net (S.J.K.); yoohyunju@amc.seoul.kr (H.J.Y.)

<sup>2</sup> School of Biological Sciences, University of Ulsan, Ulsan 44610, Republic of Korea; shback@ulsan.ac.kr (S.H.B.)

\* Correspondence: yoohyunju@amc.seoul.kr; Tel: 82-02-3010-4029

## Supplementary Table

| Matrix               | Analyte                    | Amount spiked ( $\mu\text{M}$ ) | Amount recovered ( $\mu\text{M}$ ) | Quantitation accuracy (%) |     |
|----------------------|----------------------------|---------------------------------|------------------------------------|---------------------------|-----|
|                      |                            |                                 |                                    | Average                   | RSD |
| Mouse feces          | Acetic acid                | 500                             | -                                  | -                         | -   |
|                      | Propionic acid             | 500                             | 580                                | 116                       | 14  |
|                      | Isobutyric acid            | 500                             | 508                                | 102                       | 6   |
|                      | Butyric acid               | 500                             | 553                                | 111                       | 1   |
|                      | 2,2-Dimethylpropionic acid | 500                             | 255                                | 51                        | 12  |
|                      | 2-Methylbutyric acid       | 500                             | 373                                | 75                        | 12  |
|                      | Isovaleric acid            | 500                             | 256                                | 51                        | 12  |
|                      | Valeric acid               | 500                             | 424                                | 85                        | 6   |
|                      | 2,2-Dimethylbutyric acid   | 500                             | 259                                | 52                        | 16  |
|                      | 2-Ethylbutyric acid        | 500                             | 252                                | 50                        | 8   |
|                      | 2-Methylvaleric acid       | 500                             | 265                                | 53                        | 8   |
| Caproic acid         | 500                        | 441                             | 88                                 | 2                         |     |
| Mouse plasma         | Acetic acid                | 100                             | 92                                 | 92                        | 1   |
|                      |                            | 500                             | 507                                | 101                       | 6   |
|                      | Propionic acid             | 100                             | 87                                 | 87                        | 7   |
|                      |                            | 500                             | 554                                | 111                       | 16  |
|                      | Isobutyric acid            | 100                             | 120                                | 120                       | 8   |
|                      |                            | 500                             | 650                                | 130                       | 4   |
|                      | Butyric acid               | 100                             | 98                                 | 98                        | 5   |
|                      |                            | 500                             | 569                                | 114                       | 2   |
|                      | 2,2-Diethylpropionic acid  | 100                             | 87                                 | 87                        | 9   |
|                      |                            | 500                             | 391                                | 78                        | 9   |
|                      | 2-Methylbutyric acid       | 100                             | 118                                | 118                       | 11  |
|                      |                            | 500                             | 510                                | 102                       | 3   |
|                      | Isovaleric acid            | 100                             | 78                                 | 78                        | 2   |
|                      |                            | 500                             | 343                                | 69                        | 11  |
|                      | Valeric acid               | 100                             | 88                                 | 88                        | 4   |
|                      |                            | 500                             | 424                                | 85                        | 2   |
|                      | 2,2-Dimethylbutyric acid   | 100                             | 78                                 | 78                        | 6   |
|                      |                            | 500                             | 593                                | 119                       | 5   |
| 2-Ethylbutyric acid  | 100                        | 61                              | 61                                 | 2                         |     |
|                      | 500                        | 254                             | 51                                 | 14                        |     |
| 2-Methylvaleric acid | 100                        | 80                              | 80                                 | 4                         |     |
|                      | 500                        | 308                             | 62                                 | 9                         |     |
| Caproic acid         | 100                        | 102                             | 102                                | 6                         |     |
|                      | 500                        | 427                             | 85                                 | 9                         |     |
| Human EBC            | Acetic acid                | 100                             | 81                                 | 81                        | -   |
|                      |                            | 500                             | 533                                | 107                       | -   |
|                      | Propionic acid             | 100                             | 88                                 | 88                        | -   |
|                      |                            | 500                             | 540                                | 108                       | -   |
|                      | Isobutyric acid            | 100                             | 94                                 | 94                        | -   |
|                      |                            | 500                             | 458                                | 92                        | -   |
|                      | Butyric acid               | 100                             | 82                                 | 82                        | -   |
|                      |                            | 500                             | 469                                | 94                        | -   |
|                      | 2,2-Diethylpropionic acid  | 100                             | 105                                | 105                       | -   |
|                      |                            | 500                             | 472                                | 94                        | -   |
|                      | 2-Methylbutyric acid       | 100                             | 69                                 | 69                        | -   |
|                      |                            | 500                             | 307                                | 61                        | -   |
|                      | Isovaleric acid            | 100                             | 87                                 | 87                        | -   |
|                      |                            | 500                             | 408                                | 82                        | -   |
|                      | Valeric acid               | 100                             | 113                                | 113                       | -   |
|                      |                            | 500                             | 572                                | 114                       | -   |
|                      | 2,2-Dimethylbutyric acid   | 100                             | 75                                 | 75                        | -   |
|                      |                            | 500                             | 509                                | 102                       | -   |
| 2-Ethylbutyric acid  | 100                        | 52                              | 52                                 | -                         |     |
|                      | 500                        | 396                             | 79                                 | -                         |     |
| 2-Methylvaleric acid | 100                        | 104                             | 104                                | -                         |     |
|                      | 500                        | 447                             | 89                                 | -                         |     |
| Caproic acid         | 100                        | 97                              | 97                                 | -                         |     |
|                      | 500                        | 572                             | 114                                | -                         |     |

**Table S1.** Quantitation accuracies of spiked SCFAs in mouse feces, mouse plasma and human EBC. Quantitation accuracy (%) of each SCFA was calculated using the equation of  $(\text{the measured amount of SCFA in spiked supernatant} - \text{the measured amount of SCFA in non-spiked control}) \div \text{the known amount of spiked SCFA in spiked supernatant} \times 100$ . Three independent measurements were used, except human EBC where only one measurement was performed. Mouse feces already contain significant amount of acetic acid, thus acetic acid was not included in the spiking solution because it will exceed dynamic range. Amount spiked ( $\mu\text{M}$ ) means “the known amount of spiked SCFA in spiked supernatant”, and amount recovered ( $\mu\text{M}$ ) means “the measured amount of SCFA in spiked supernatant – the measured amount of SCFA in non-spiked control”.

## Supplementary Figures

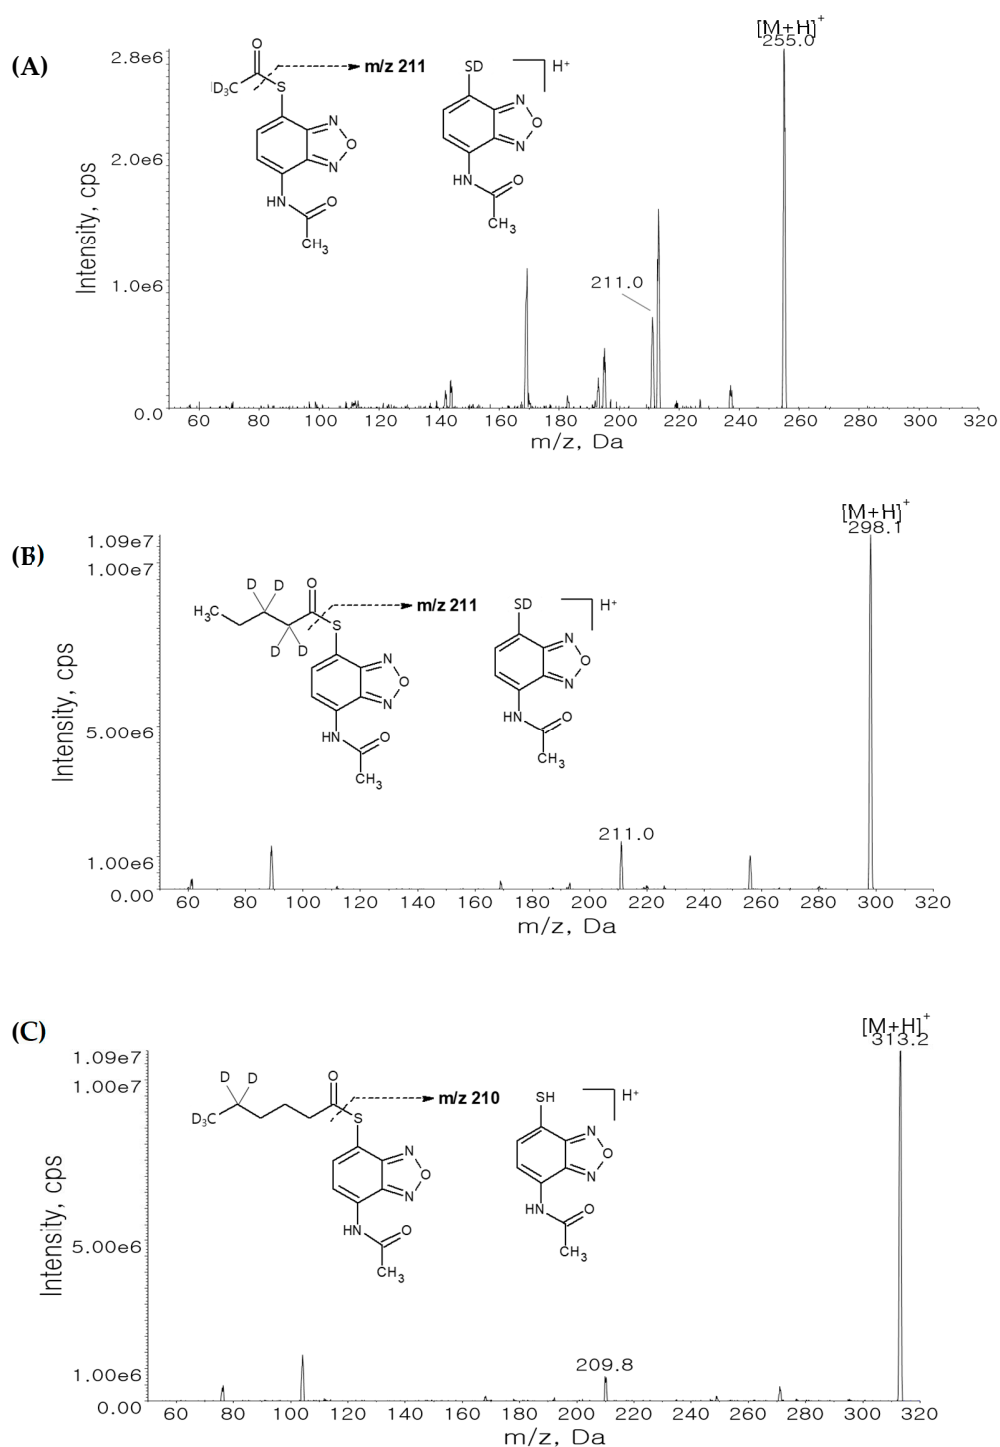

**Figure S1.** Tandem mass spectrometry (MS/MS) spectra of (A) derivatized acetic acid-2,2,2-d<sub>3</sub> (internal standard for C2), (B) derivatized valeric acid-2,2,3,3-d<sub>4</sub> (internal standard for C5), (C) derivatized Caproic acid-5,5,6,6-d<sub>5</sub> (internal standard for C6). Collision energies were 15 V.

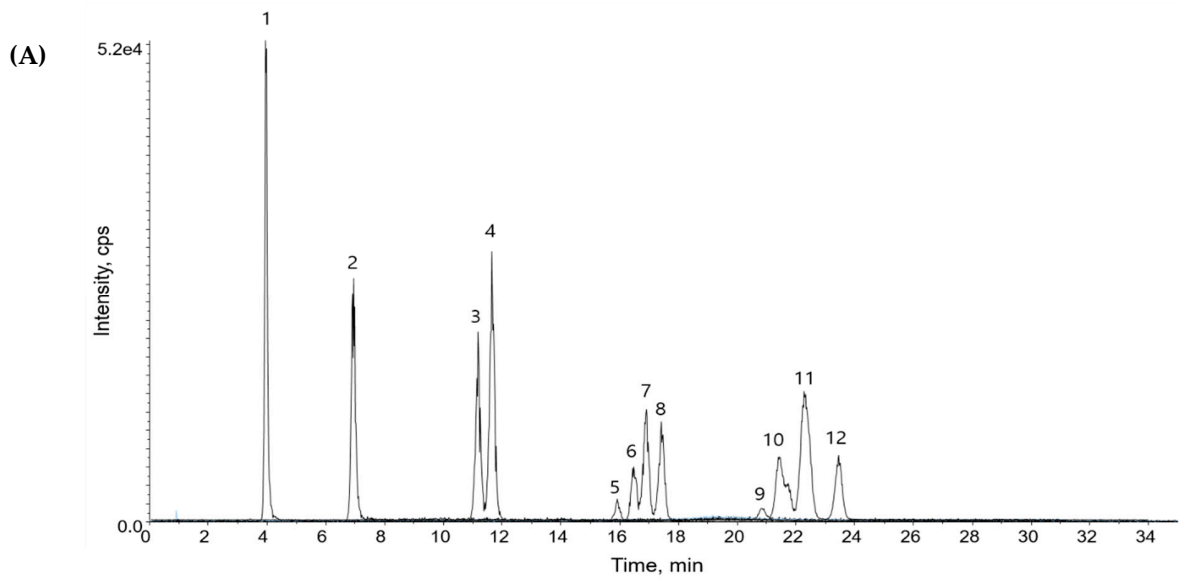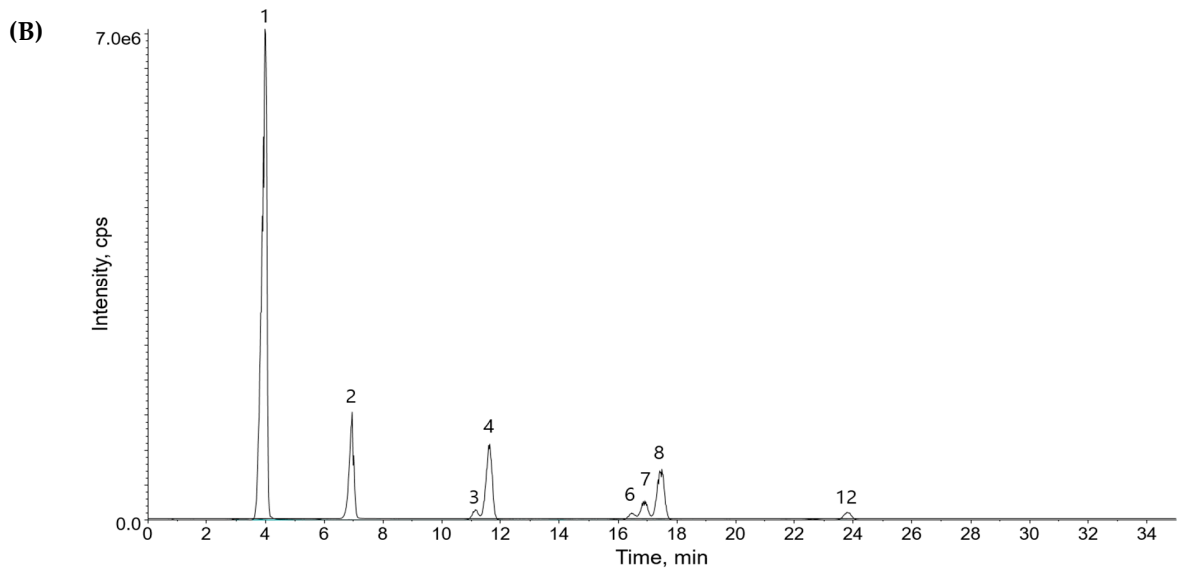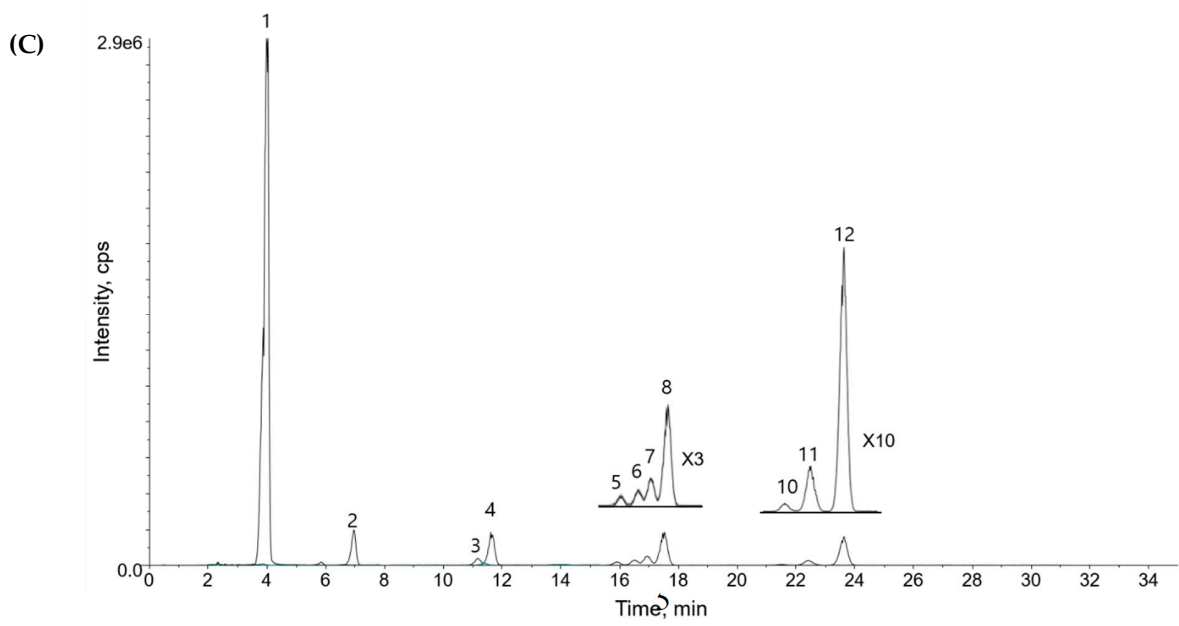

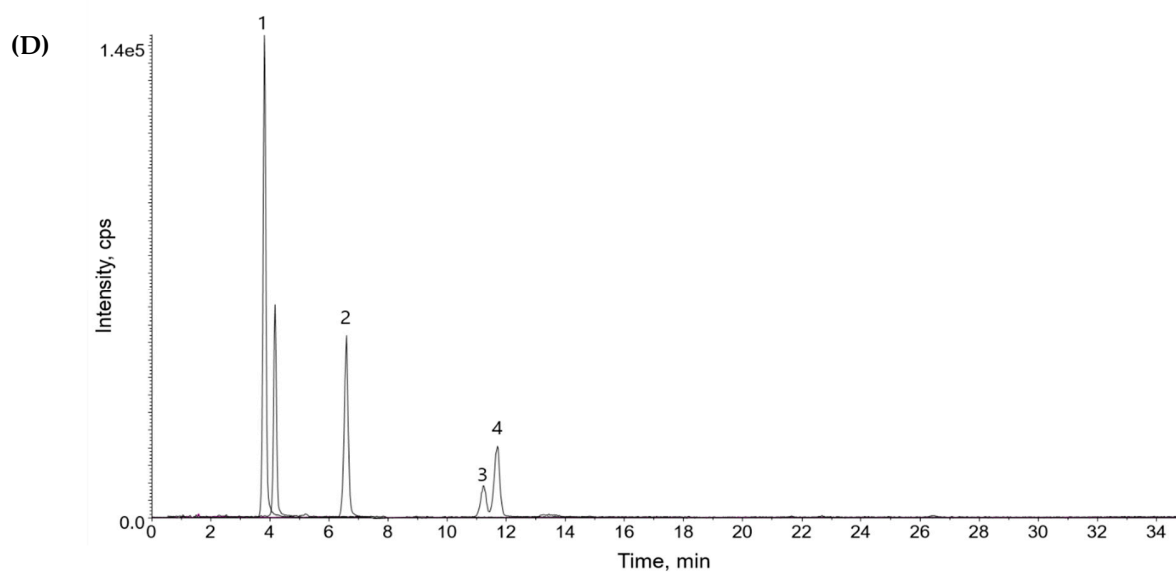

**Figure S2.** Extracted ion chromatograms of SCFAs in (A) a standard solution (1 $\mu$ M) and (B) mouse feces (C) mouse plasma, and (D) human EBC. The number on top of each peak represents each SCFA. (1: acetic acid; 2: propionic acid; 3: isobutyric acid; 4: butyric acid; 5: 2,2-dimethylpropionic acid; 6: 2-methylbutyric acid; 7: isovaleric acid; 8: valeric acid; 9: 2,2-dimethylbutyric acid; 10: 2-ethylbutyric acid; 11: 2-methylvaleric acid; 12: caproic acid)

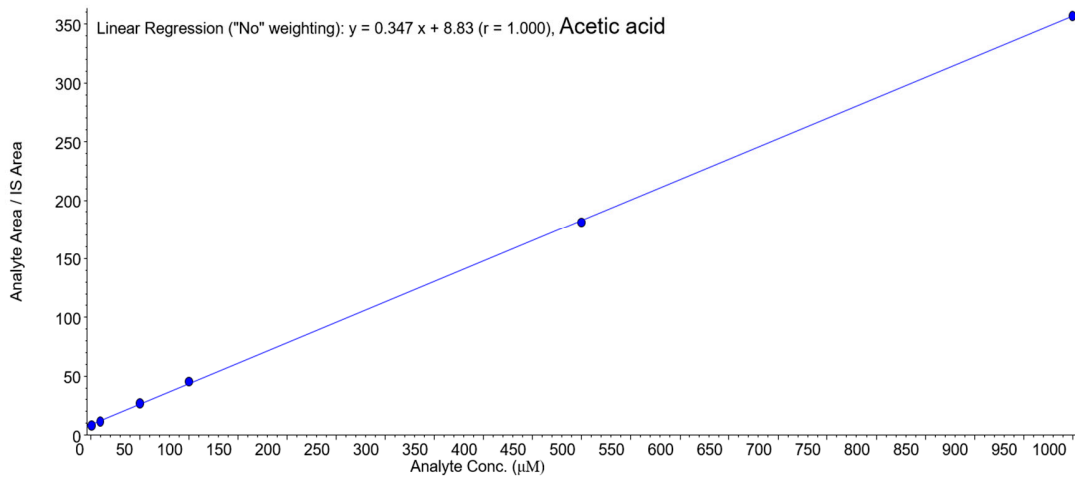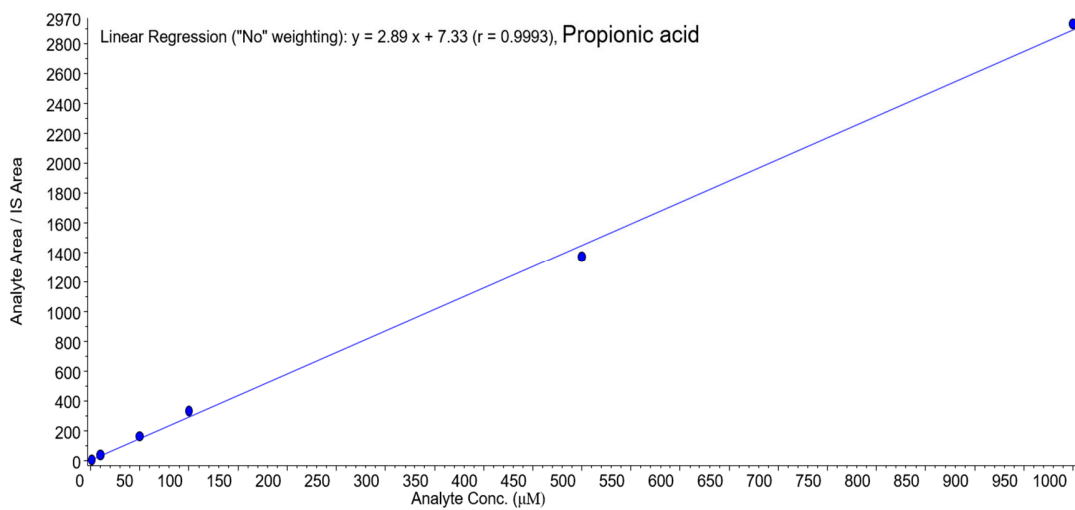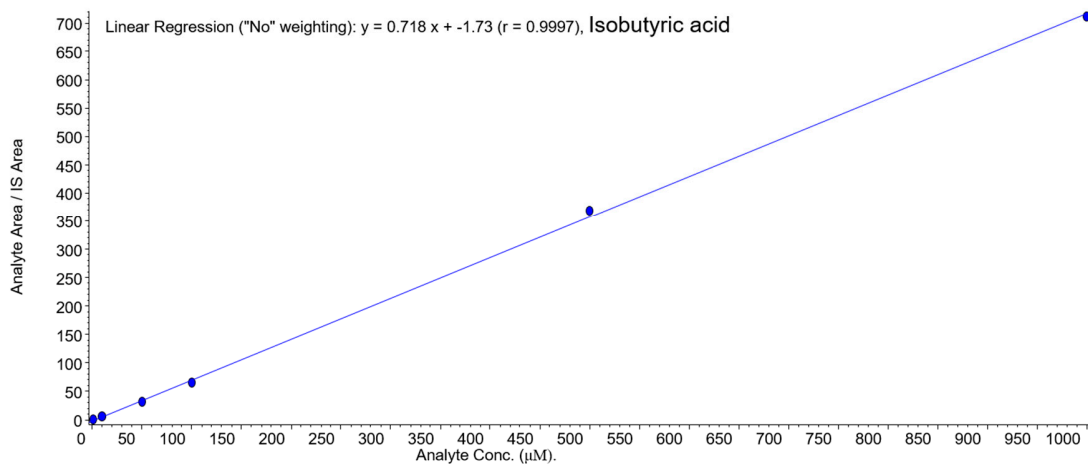

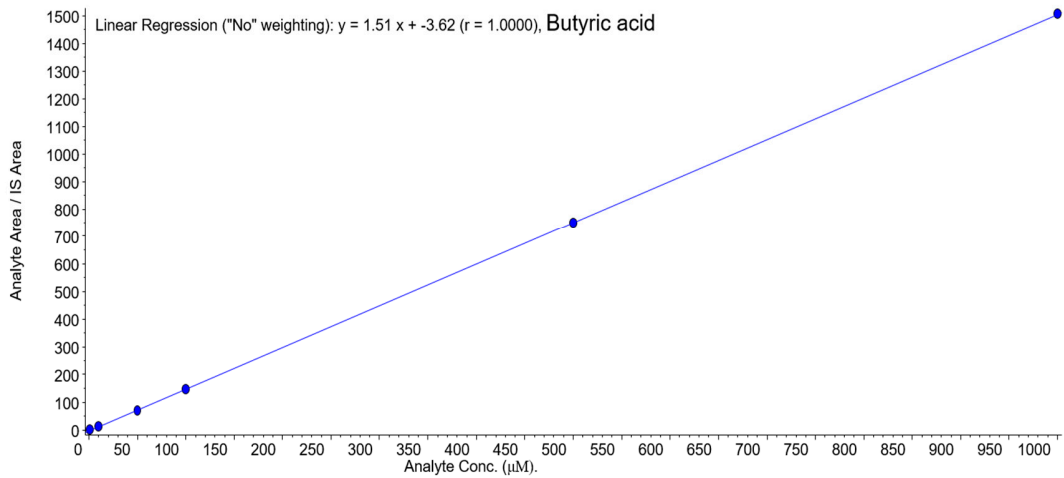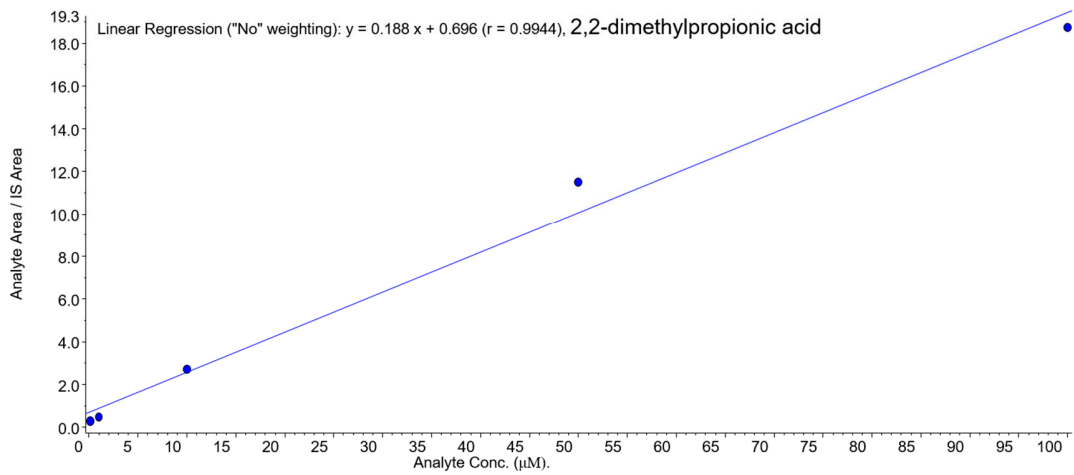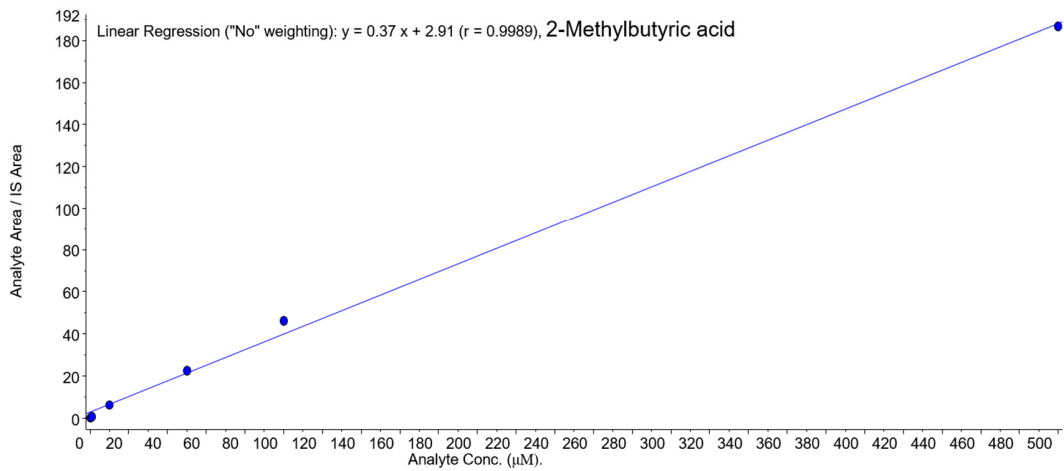



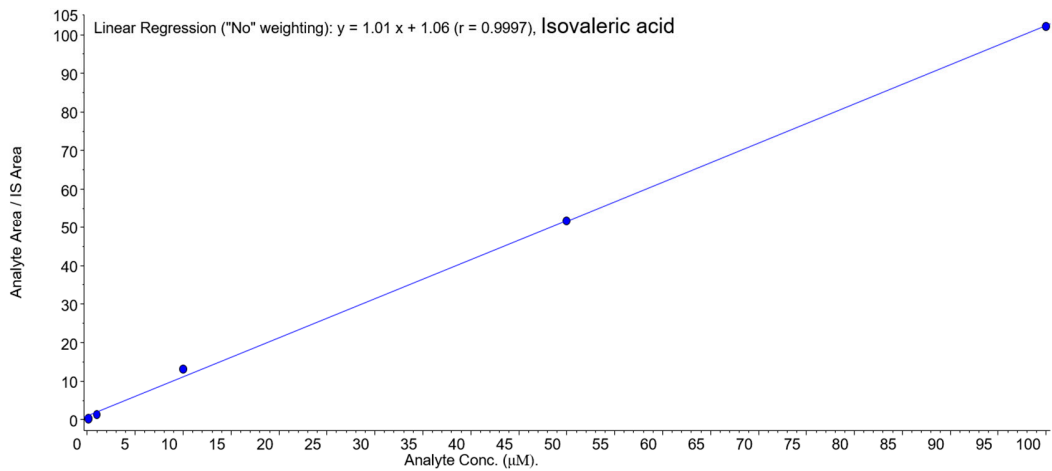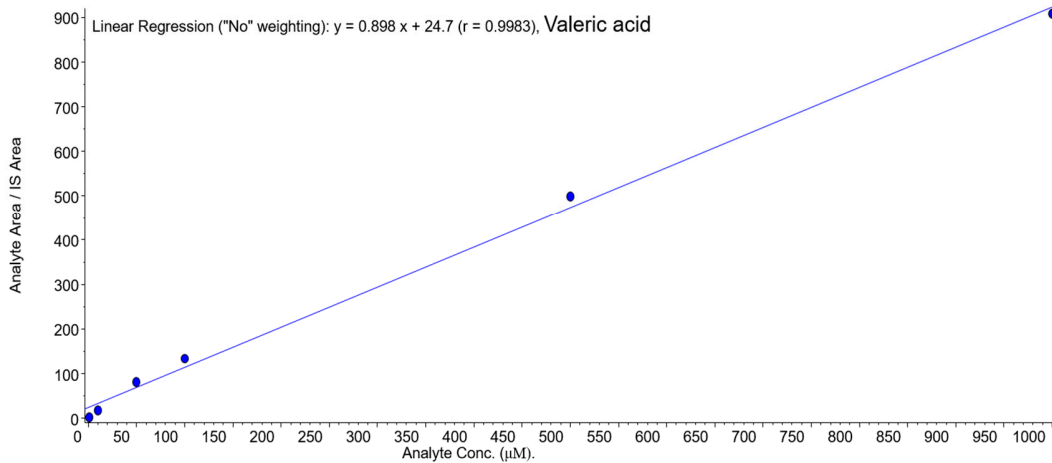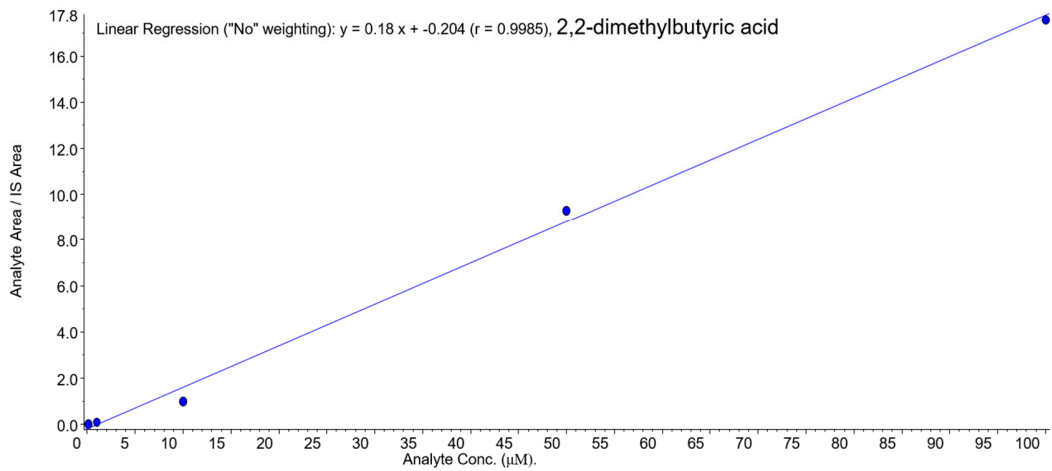

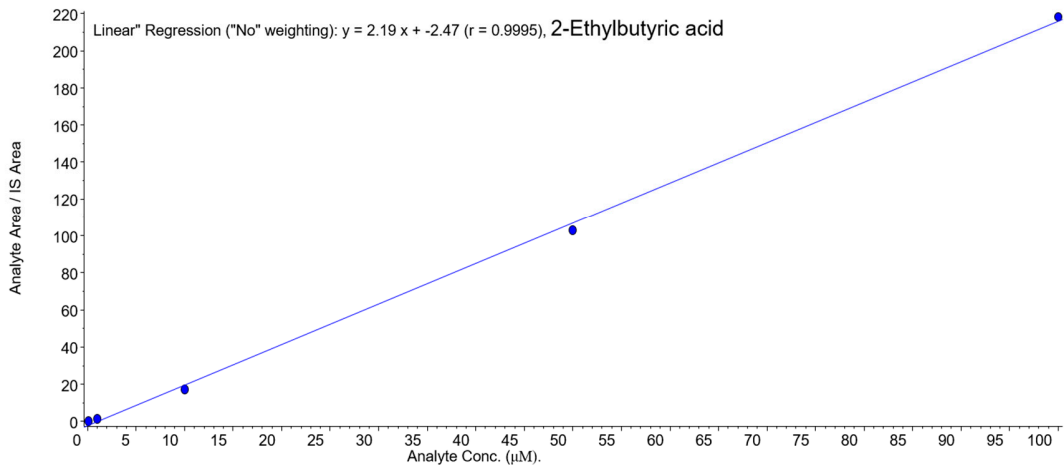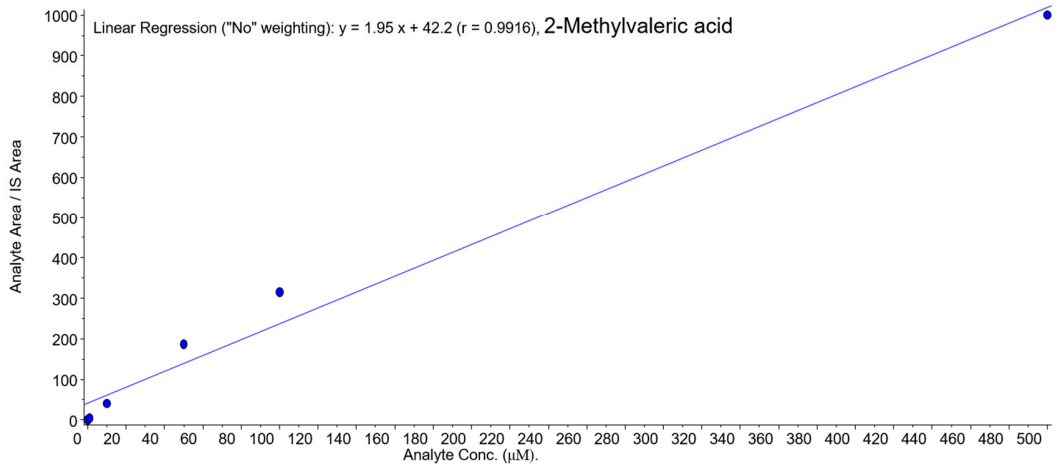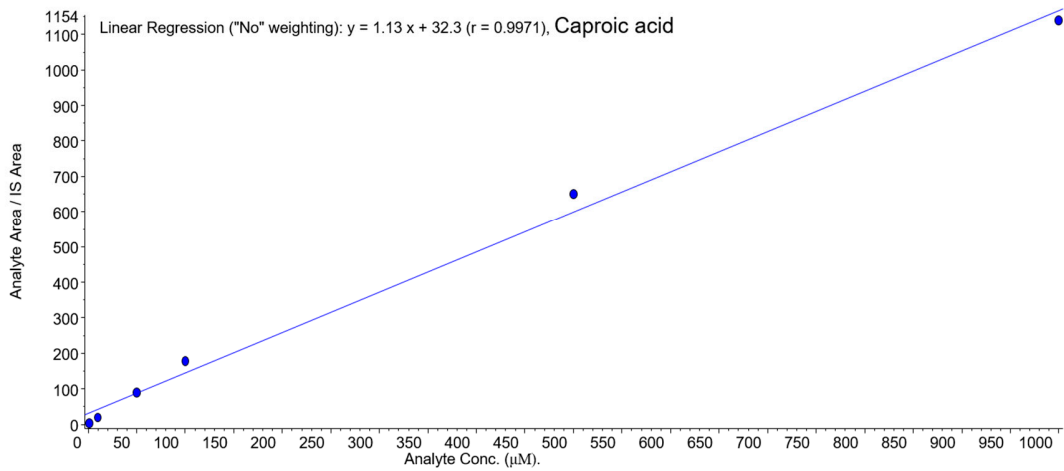

**Figure S3.** Calibration curves for 12 SCFAs. Calibration range for acetic acid: 1  $\mu\text{M}$  - 1 mM; 2,2-dimethylpropionic acid, isovaleric acid, 2,2-dimethylbutyric acid, and 2-ethylbutyric acid: 100 nM - 100  $\mu\text{M}$ ; 2-methylbutyric acid and 2-methylvaleric acid: 100 nM - 500  $\mu\text{M}$ ; Other SCFAs: 100 nM - 1 mM.

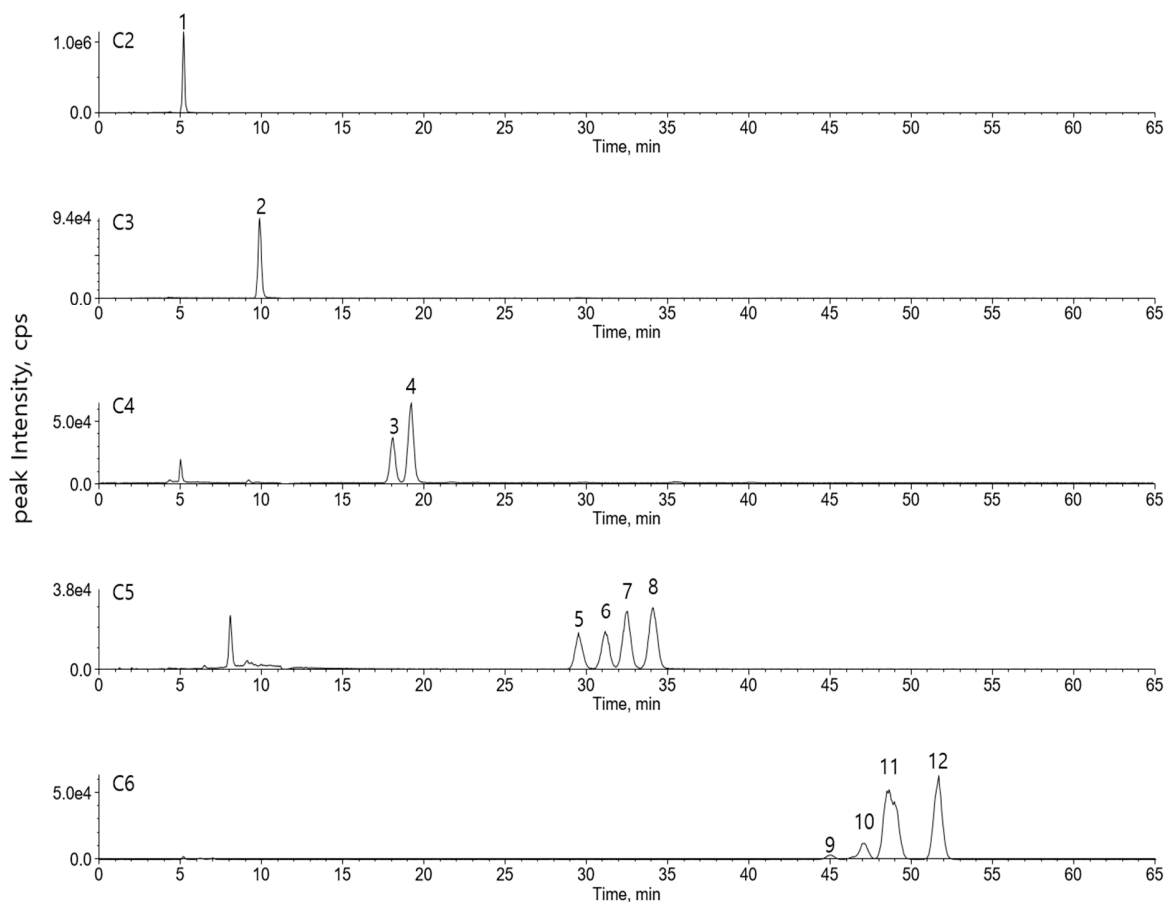

**Figure S4.** Extracted ion chromatograms of 12 SCFAs in a standard solution (10  $\mu$ M). The number on top of each peak represents each SCFA (1: acetic acid; 2: propionic acid; 3: isobutyric acid; 4: butyric acid; 5: 2,2-dimethylpropionic acid; 6: 2-methylbutyric acid; 7: isovaleric acid; 8: valeric acid; 9: 2,2-dimethylbutyric acid; 10: 2-ethylbutyric acid; 11: 2-methylvaleric acid; 12: caproic acid). IS represents internal standard. LC separation was performed at a flow rate of 400  $\mu$ L/min and a temperature of 23  $^{\circ}$ C. The separation gradient was as follows: 30 % B at 0 min, 30 to 40 % B in 60 min, 40 to 30 % B in 0.1 min, and 30 % B in 4.9 min. The chromatograms were obtained using the same experimental conditions described in Materials and Method, except LC flow rate, column temperature, and gradient.
